# Supplementary material for: Large-Scale Gene-Centric Analysis Identifies Novel Variants for Coronary Artery Disease
Source: PubMed Central journal article supplement (PMC3178591; doi:10.1371/journal.pgen.1002260), 2011-09-22
Supplement: pgen.1002260.s008.pdf [file pgen.1002260.s008.pdf]

**Table S4 continued. Associations with previously studied candidate variants.**

| Pathway          | Locus    | Gene            | SNP                     | Variant  | Position    | Allele | Europeans |                   |         |       | South Asians     |           |        |      | r <sup>2</sup> with best imputed proxy | Tagging level |
|------------------|----------|-----------------|-------------------------|----------|-------------|--------|-----------|-------------------|---------|-------|------------------|-----------|--------|------|----------------------------------------|---------------|
|                  |          |                 |                         |          |             |        | Freq      | OR                | 95% CI  | P     | Freq             | OR        | 95% CI | P    |                                        |               |
| Hemostasis       |          |                 |                         |          |             |        |           |                   |         |       |                  |           |        |      |                                        |               |
|                  | 5q35.3   | <i>F12</i>      | rs1801020               | C46T     | 176,769,138 | A      | 0.24      | 1.07 (1.02-1.12)  | 2.0E-03 | 0.42  | 1.02 (0.96-1.08) | 5.4E-01   | 1      | 1    |                                        |               |
|                  | 6p25.1   | <i>F13A1</i>    | rs5985                  | V34L     | 6,263,794   | A      | 0.25      | 0.98 (0.94-1.02)  | 3.8E-01 | 0.12  | 0.98 (0.90-1.08) | 7.4E-01   | 1      | 2    |                                        |               |
|                  | 1q24.2   | <i>F5</i>       | rs6025                  | R506Q    | 167,785,673 | T      | 0.03      | 0.90 (0.80-1.01)  | 6.7E-02 | 0.01  | 0.97 (0.75-1.26) | 8.4E-01   | 0.27   | 1    |                                        |               |
|                  | 13q34    | <i>F7</i>       | rs6046                  | R353Q    | 112,821,160 | A      | 0.11      | 1.00 (0.94-1.06)  | 9.8E-01 | 0.27  | 0.95 (0.89-1.02) | 1.3E-01   | 1      | 1    |                                        |               |
|                  | 17p13.2  | <i>GP1BA</i>    | rs2243093               | T-5C     | 4,776,675   | C      | 0.13      | 1.03 (0.97-1.08)  | 3.6E-01 | 0.12  | 1.03 (0.94-1.13) | 5.3E-01   | 1      | 2    |                                        |               |
|                  | 5q11.2   | <i>ITGA2</i>    | rs1062535 <sup>d</sup>  | T275T    | 52,387,170  | A      | 0.39      | 1.01 (0.9701-0.5) | 6.9E-01 | 0.36  | 0.99 (0.93-1.05) | 6.7E-01   | 1      | 1    |                                        |               |
|                  | 17q21.32 | <i>ITGB3</i>    | rs5918                  | L33P     | 42,715,729  | C      | 0.15      | 0.99 (0.94-1.05)  | 8.2E-01 | 0.09  | 0.89 (0.80-1.00) | 4.0E-02   | 1      | 1    |                                        |               |
| Metabolic        |          |                 |                         |          |             |        |           |                   |         |       |                  |           |        |      |                                        |               |
|                  | 5q33.1   | <i>ADRB2</i>    | rs1042713               | G16R     | 148,186,633 | A      | 0.37      | 1.04 (1.00-1.08)  | 4.1E-02 | 0.44  | 0.99 (0.94-1.06) | 8.7E-01   | 1      | 1    |                                        |               |
|                  | 5q33.1   | <i>ADRB2</i>    | rs1042714               | E27Q     | 148,186,666 | G      | 0.43      | 0.95 (0.91-0.98)  | 3.0E-03 | 0.22  | 1.03 (0.96-1.11) | 3.9E-01   | 1      | 1    |                                        |               |
|                  | 5q33.1   | <i>ADRB2</i>    | rs1800888               | I164T    | 148,187,078 | T      | 0.01      | 0.94 (0.80-1.10)  | 4.4E-01 | <0.01 | -                | -         | 0.16   | 1    |                                        |               |
|                  | 8p12     | <i>ADRB3</i>    | rs4994                  | W64R     | 37,942,955  | G      | 0.07      | 0.99 (0.92-1.06)  | 6.7E-01 | 0.13  | 0.97 (0.89-1.06) | 5.4E-01   | 0.43   | 1    |                                        |               |
|                  | 16q24.3  | <i>CYBA</i>     | rs4673                  | Y72H     | 87,240,737  | A      | 0.34      | 1.04 (1.00-1.08)  | 6.9E-02 | 0.37  | 0.99 (0.93-1.05) | 6.8E-01   | 1      | 1    |                                        |               |
|                  | 8q24.3   | <i>CYP11B2</i>  | rs1799998               | T-344C   | 143,996,602 | G      | 0.45      | 1.01 (0.97-1.04)  | 7.7E-01 | 0.44  | 0.99 (0.93-1.05) | 7.0E-01   | 1      | 2    |                                        |               |
|                  | 10q23.33 | <i>CYP2C9</i>   | rs1057910               | I359L    | 96,731,043  | C      | 0.07      | 1.02 (0.95-1.10)  | 6.0E-01 | 0.11  | 0.99 (0.90-1.08) | 7.7E-01   | 1      | 2    |                                        |               |
|                  | 10q23.33 | <i>CYP2C9</i>   | rs17443251 <sup>b</sup> |          | 96,697,880  | C      | 0.13      | 1.02 (0.96-1.07)  | 5.2E-01 | 0.05  | 0.87 (0.76-0.99) | 4.0E-02   | 1      | 2    |                                        |               |
|                  | 6q23.2   | <i>ENPP1</i>    | rs1044498               | K121Q    | 132,214,061 | C      | 0.14      | 1.03 (0.98-1.09)  | 2.8E-01 | 0.17  | 0.98 (0.91-1.06) | 6.6E-01   | 1      | 2    |                                        |               |
|                  | 2q36.3   | <i>IRS1</i>     | rs1801278               | G971R    | 227,368,788 | T      | 0.07      | 1.09 (0.97-1.22)  | 1.4E-01 | 0.04  | 1.02 (0.83-1.25) | 8.7E-01   | 0.20   | 1    |                                        |               |
|                  | 1p31.3   | <i>LEPR</i>     | rs1805096 <sup>e</sup>  | P1019P   | 65,874,845  | A      | 0.38      | 0.99 (0.96-1.03)  | 7.2E-01 | 0.45  | 0.99 (0.93-1.05) | 7.1E-01   | 1      | 1    |                                        |               |
|                  | 1p36.22  | <i>MTHFR</i>    | rs1801133               | C677T    | 11,778,965  | A      | 0.35      | 1.04 (1.00-1.08)  | 6.1E-02 | 0.16  | 1.04 (0.96-1.13) | 2.9E-01   | 1      | 1    |                                        |               |
|                  | 1q43     | <i>MTR</i>      | rs1805087               | D919G    | 235,115,123 | G      | 0.19      | 1.01 (0.96-1.06)  | 7.7E-01 | 0.31  | 0.98 (0.91-1.04) | 4.4E-01   | 1      | 2    |                                        |               |
|                  | 3p25.1-2 | <i>PPARG</i>    | rs1801282               | Pro12Ala | 12,368,125  | G      | 0.12      | 1.01 (0.95-1.07)  | 7.2E-01 | 0.13  | 1.08 (1.00-1.18) | 9.9E-02   | 1      | 1    |                                        |               |
|                  | 2p11.2   | <i>VAMP8</i>    | rs1010                  |          | 85,662,493  | C      | 0.42      | 1.06 (1.03-1.10)  | 8.7E-04 | 0.38  | 1.04 (0.97-1.10) | 2.5E-01 # | 1      | 2    |                                        |               |
| Mineralcorticoid |          |                 |                         |          |             |        |           |                   |         |       |                  |           |        |      |                                        |               |
|                  | 17q23.3  | <i>ACE</i>      | rs4343 <sup>a</sup>     | Ins/Del  | 58,919,763  | A      | 0.47      | 0.97 (0.93-1.01)  | 9.2E-02 | 0.41  | 1.05 (0.99-1.11) | 1.3E-01   | 1      | 1    |                                        |               |
|                  | 1q42.2   | <i>AGT</i>      | rs699                   | M235T    | 228,912,417 | G      | 0.41      | 1.03 (0.99-1.06)  | 1.9E-01 | 0.39  | 1.03 (0.97-1.10) | 2.9E-01   | 1      | 1    |                                        |               |
|                  | 3q24     | <i>AGTR1</i>    | rs5186                  | A1166C   | 149,942,678 | C      | 0.30      | 1.00 (0.96-1.04)  | 8.6E-01 | 0.09  | 1.01 (0.91-1.12) | 8.0E-01   | 0.96   | 1    |                                        |               |
|                  | 14q32.3  | <i>BDKRB2</i>   | rs1799722               | C-58T    | 95,740,892  | T      | 0.49      | 0.99 (0.95-1.03)  | 6.3E-01 | 0.37  | 0.98 (0.92-1.04) | 4.4E-01   | 0.18   | 2    |                                        |               |
| Other            |          |                 |                         |          |             |        |           |                   |         |       |                  |           |        |      |                                        |               |
|                  | 4p16.3   | <i>ADD1</i>     | rs4961                  | G460W    | 2,876,505   | T      | 0.19      | 0.99 (0.95-1.04)  | 7.6E-01 | 0.17  | 1.02 (0.94-1.10) | 6.8E-01   | 1      | 1    |                                        |               |
|                  | 9p21.3   | <i>CDKN2A/B</i> | rs1333049               |          | 22,115,503  | C      | 0.52      | 1.28 (1.23-1.33)  | 2.7E-34 | 0.51  | 1.12 (1.05-1.19) | 3.3E-04   | 1      | GWAS |                                        |               |
|                  | 22q11.21 | <i>COMT</i>     | rs4680                  | V158M    | 18,331,271  | G      | 0.48      | 0.99 (0.95-1.02)  | 5.2E-01 | 0.46  | 0.97 (0.91-1.03) | 3.3E-01   | 1      | 2    |                                        |               |
|                  | 6q25.1   | <i>ESR1</i>     | rs2234693               | T-401C   | 152,205,028 | C      | 0.46      | 0.98 (0.95-1.02)  | 3.0E-01 | 0.42  | 1.02 (0.96-1.08) | 5.6E-01   | 1      | 1    |                                        |               |
|                  | 6p22.1   | <i>HFE</i>      | rs1799945               | H63D     | 26,199,158  | G      | 0.15      | 0.97 (0.92-1.02)  | 2.4E-01 | 0.07  | 0.88 (0.79-0.99) | 3.1E-02   | 1      | 2    |                                        |               |
|                  | 6p22.1   | <i>HFE</i>      | rs1800562               | C282Y    | 26,201,120  | A      | 0.06      | 1.03 (0.96-1.12)  | 3.9E-01 | <0.01 | -                | -         | 1      | 2    |                                        |               |
|                  | 13q14.2  | <i>HTR2A</i>    | rs9526246 <sup>c</sup>  |          | 46,347,862  | A      | 0.42      | 1.05 (1.01-1.08)  | 1.9E-02 | 0.43  | 1.03 (0.97-1.10) | 2.9E-01   | 1      | 2    |                                        |               |
|                  | 12p12.3  | <i>MGP</i>      | rs1049897 <sup>f</sup>  |          | 14,925,788  | A      | 0.39      | 1.03 (0.99-1.06)  | 1.9E-01 | 0.39  | 1.02 (0.96-1.08) | 5.1E-01   | 1      | 2    |                                        |               |
|                  | 1q41     | <i>MIA3</i>     | rs17465637              |          | 220,890,152 | C      | 0.73      | 1.08 (1.02-1.14)  | 3.8E-03 | 0.64  | 1.09 (1.00-1.18) | 5.2E-02   | 1      | GWAS |                                        |               |
|                  | 1p36.22  | <i>NPPA</i>     | rs5065                  | R29X     | 11,906,068  | G      | 0.15      | 0.97 (0.92-1.02)  | 2.9E-01 | 0.16  | 0.96 (0.89-1.04) | 3.5E-01   | 1      | 1    |                                        |               |
|                  | 5q31.3   | <i>NR3C1</i>    | rs6195                  | N363S    | 142,759,510 | C      | 0.03      | 0.96 (0.87-1.07)  | 4.8E-01 | <0.01 |                  |           | 1      | 2    |                                        |               |
|                  | 3q27.1   | <i>THPO</i>     | rs6141                  | A5713G   | 185,572,960 | C      | 0.46      | 1.03 (0.99-1.07)  | 1.3E-01 | 0.47  | 0.97 (0.92-1.03) | 3.6E-01   | 1      | 2    |                                        |               |

Variants ordered by biological pathway, then gene. Per-allele odds ratios are presented for the effect allele, which is the minor allele in European populations.

r<sup>2</sup> with best imputed proxy was estimated using ~2.5M directly genotyped or HapMap-imputed SNPs in the CARDIoGRAM Consortium.

Tagging levels are 1 (r<sup>2</sup>>0.8 with all HapMap/Seattle SNPs of MAF≥0.02), 2 (r<sup>2</sup>>0.5 with all HapMap/Seattle SNPs of MAF≥0.05), 3 (only non-synonymous and known functional variants of MAF>0.01) and GWAS (specific SNPs previously identified in recent GWAS).

<sup>a</sup> rs4343 has r<sup>2</sup>=1 with the insertion/deletion polymorphism in the *ACE* gene in CEU HapMap 2 population.

<sup>b</sup> rs17443251 has r<sup>2</sup>=0.75 with the more commonly studied R144C variant (rs1799853) in the *CYP2C9* gene in CEU HapMap 2 population.

<sup>c</sup> rs9526246 has r<sup>2</sup>=0.97 with the more commonly studied T102C variant (rs6313) in the *HTR2A* gene in CEU HapMap 2 population.

<sup>d</sup> rs1062535 has r<sup>2</sup>=0.97 with the more commonly studied C807T variant (rs1126643) in the *ITGA2* gene in CEU HapMap 2 population.

<sup>e</sup> rs1805096 has r<sup>2</sup>=0.89 with the more commonly studied rs6700896 variant in the *LEPR* gene in CEU HapMap 2 population.

<sup>f</sup> rs1049897 has r<sup>2</sup>=1 with the more commonly studied A102T variant (rs4236) in the *MGP* gene in CEU HapMap 2 population.

<sup>g</sup> rs4968624 has r<sup>2</sup>=0.97 with the more commonly studied L125V variant (rs668) in the *PECAM1* gene in CEU HapMap 2 population.

<sup>h</sup> rs12944077 has r<sup>2</sup>=1 with the more commonly studied S563N variant (rs12953) in the *PECAM1* gene in CEU HapMap 2 population.
