# Supplementary material for: Large-Scale Gene-Centric Analysis Identifies Novel Variants for Coronary Artery Disease
Source: PubMed Central journal article supplement (PMC3178591; doi:10.1371/journal.pgen.1002260), 2011-09-22
Supplement: pgen.1002260.s012.pdf [file pgen.1002260.s012.pdf]

**Table S8. Comparison of haplotype frequencies for novel loci in European and South Asian controls.**

| Locus        | Lead SNP   | SNPs in haplotype | Europeans     |                                 | South Asians  |                                 |
|--------------|------------|-------------------|---------------|---------------------------------|---------------|---------------------------------|
|              |            |                   | SNP frequency | Haplotype frequencies*          | SNP frequency | Haplotype frequencies           |
| <i>LIPA</i>  | rs2246942  | 3                 | 0.35          | 0.66/ <b>0.29</b> / <b>0.04</b> | 0.50          | 0.48/ <b>0.41</b> / <b>0.11</b> |
| <i>TRIB1</i> | rs17321515 | 2                 | 0.46          | 0.53/ <b>0.47</b>               | 0.35          | 0.63/ <b>0.37</b>               |
| <i>ABCG8</i> | rs4299376  | 1                 | 0.33          | N/A                             | 0.28          | N/A                             |
| <i>IL5</i>   | rs2706399  | 2                 | 0.48          | 0.50/ <b>0.43</b> / <b>0.08</b> | 0.53          | 0.44/ <b>0.43</b> / <b>0.13</b> |

Haplotypes are displayed in decreasing frequency, with the same haplotype order in both ethnicities.

\* = haplotype frequencies in bold are those containing the CAD risk-associated allele of the lead SNP

SNPs were selected for inclusion in the haplotype if they had  $r^2 \geq 0.5$  in either the European or the South Asian controls. The 3330 PROCARDIS controls were used to represent the European populations, whilst the PROMIS controls were used to represent the South Asian population.

Only haplotypes that were common (frequency > 5%) in at least one population are displayed.
