# Supplementary material for: Large-Scale Gene-Centric Analysis Identifies Novel Variants for Coronary Artery Disease
Source: PLOS journal article supplement (doi:10.1371/journal.pgen.1002260), 2011-09-22
Supplement: S1 (10.1371/journal.pgen.1002260.s001) [file journal.pgen.1002260.s001]

**Figure S1. Power to detect associated variants in discovery and replication stages.**

**a) Discovery stage meta-analysis.**

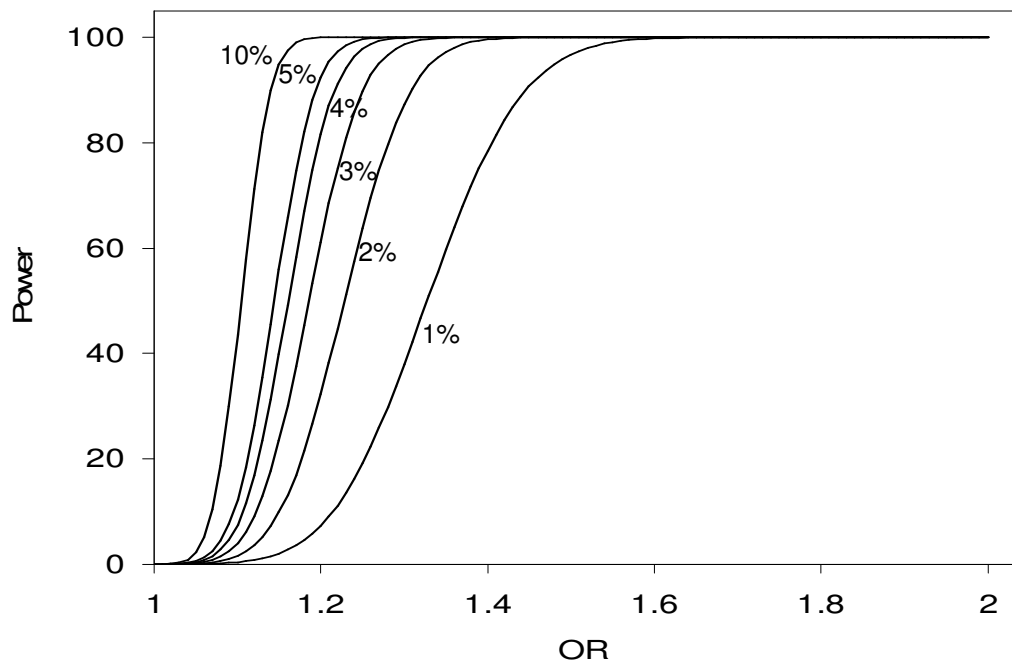

Power to detect an association with  $\alpha = 10^{-4}$  (two-sided) assuming a per-allele effect and a discovery stage study size of 11,202 coronary disease cases and 30,733 controls (equivalent to the European studies in the discovery stage) across a range of minor allele frequencies (1%,2%,3%,4%,5%,10%). These power calculations assume that there is no between-study heterogeneity.

**b) Replication stage meta-analysis.**

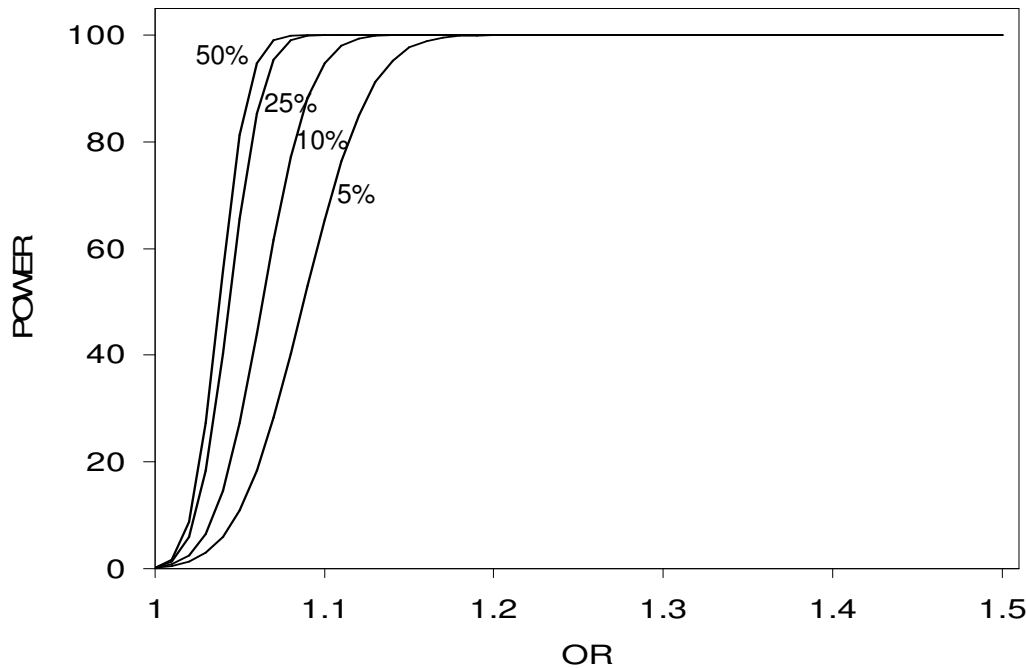

Power to detect an association with  $\alpha = 1.9 \times 10^{-3}$  (one-sided) assuming a per-allele effect and a replication stage study size of 17,121 coronary disease cases and 40,473 controls (equivalent to the whole replication stage) range of minor allele frequencies (5%,10%,25%,50%). These power calculations assume that there is no between-study heterogeneity.
